# Supplementary material for: A method for accurate detection of genomic microdeletions using real-time quantitative PCR
Source: PubMed Central journal article supplement (PMC1327677; doi:10.1186/1471-2164-6-180), 2005-12-13
Supplement: 1471-2164-6-180-S3.pdf [file 1471-2164-6-180-S3.pdf]

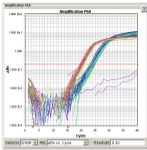

a)

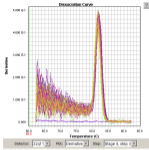

b)

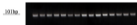

c)

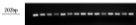

d)

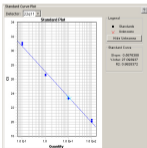

e)

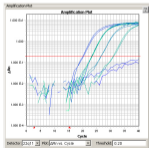

e)
